# Supplementary material for: Conversion of biomass derived valerolactone into high octane number gasoline with an ionic liquid
Source: Royal Society of Chemistry journal article supplement (doi:10.1039/c4gc01792g), 2014-11-03
Supplement: c4gc01792g1.pdf [file c4gc01792g1.pdf]

## **Conversion of Biomass Derived Valerolactone into High Octane Number Gasoline with Ionic Liquid**

**Jiayu Xin, Dongxia Yan, Olubunmi Ayodele, Zhan Zhang , Xingmei Lu, Suojiang Zhang\***

---

*<sup>a</sup> Beijing Key Laboratory of Ionic Liquids Clean Process, State Key Laboratory of Multiphase Complex System  
Institute of Process Engineering, Chinese Academy of Sciences  
Zhongguancun, Beiertiao, Haidian, Beijing 100190 (China)  
Fax: (+86) 10-8262-7080  
E-mail: sjzhang@ipe.ac.cn*

# Contents

|                       | Page |
|-----------------------|------|
| Materials and Methods | 3    |
| Figure S1             | 4    |
| Figure S2             | 5    |
| Figure S3             | 6    |
| Figure S4             | 7    |
| Figure S5             | 8    |
| Table S1              | 9    |
| Table S2              | 10   |
| Table S3              | 11   |
| Table S4              | 12   |
| Table S5              | 13   |

## Materials and methods

### Preparation of Pd/C

Palladium catalyst was prepared by impregnation on the carbon support with a 0.047 M solution of  $\text{H}_2\text{PdCl}_4$ . Activated carbon was coped with 30 %  $\text{HNO}_3$  before use. According to theoretical calculations, a certain amount of chloride precursor ( $\text{H}_2\text{PdCl}_4$ ) was added into 3.0 g activated carbon dropwise which mixed with 60 ml distilled water at 60 °C. For deposition, aqueous  $\text{Na}_2\text{CO}_3$  solution (2 mol/L) was added to the impregnating solution in order to maintain constant pH. After stirred for 8 h, the reduction was performed in liquid phase using formaldehyde at 80 °C for 2 h. Then, the catalyst was washed with 80 °C distilled water and dried at vacuum oven for 18 h.

### Preparation of Pd/ZSM-8

ZSM-8 was purchased from J&K Scientific Ltd. and calcined at 600 °C for 4 h. Then the ZSM-8 was subjected to ion-exchange treatment at 60 °C using 1 mol/L ammonium nitrate with volume ratio of ammonium salt solution and zeolite of 6:1. Then ZSM-8 is washed with deionized water for 3 times and dried at 120 °C over night, and calcined at 500 °C for 5 h to obtain hydrogenous zeolite. After hole-processed at 60 °C for 3 hours using 1 mol/L hydrochloric acid, washed with deionized water, dried at 120 °C for 12 h, and calcined at 500 °C for 3 h, the ZSM-8 was then contacted with  $\text{H}_2\text{PdCl}_4$  with aqueous  $\text{Na}_2\text{CO}_3$  solution (2 mol/L) as a precipitating agent. The solid is washed with deionized water until no chloride ions are present, dried at 120 °C over night and calcined at 600 °C for 4 in a muffle furnace.

### Hydrogenation of 1-butene and 2-butene with Pd/C

Hydrogenation was performed in a 100 ml stirred stainless steel reactor. Reaction temperature was maintained by placing the reactor in a heating coat. Butene was firstly pumped into the reactor by a syringe pump, after reached the designed temperature,  $\text{H}_2$  was pumped and maintained with designed reaction time.

### Isomerization of *n*-butane to isobutane

Conversion of *n*-butane to isobutane is carried out in a fixed bed reactor using extrusion-molded catalyst at 350 and 380 degrees C, 0.3-3 MPa, and 0.5-20 hour<sup>-1</sup>, moving bed reactor using catalyst pellets at 150-600 °C, 0.3 MPa, and WHSV of 1 h<sup>-1</sup>.

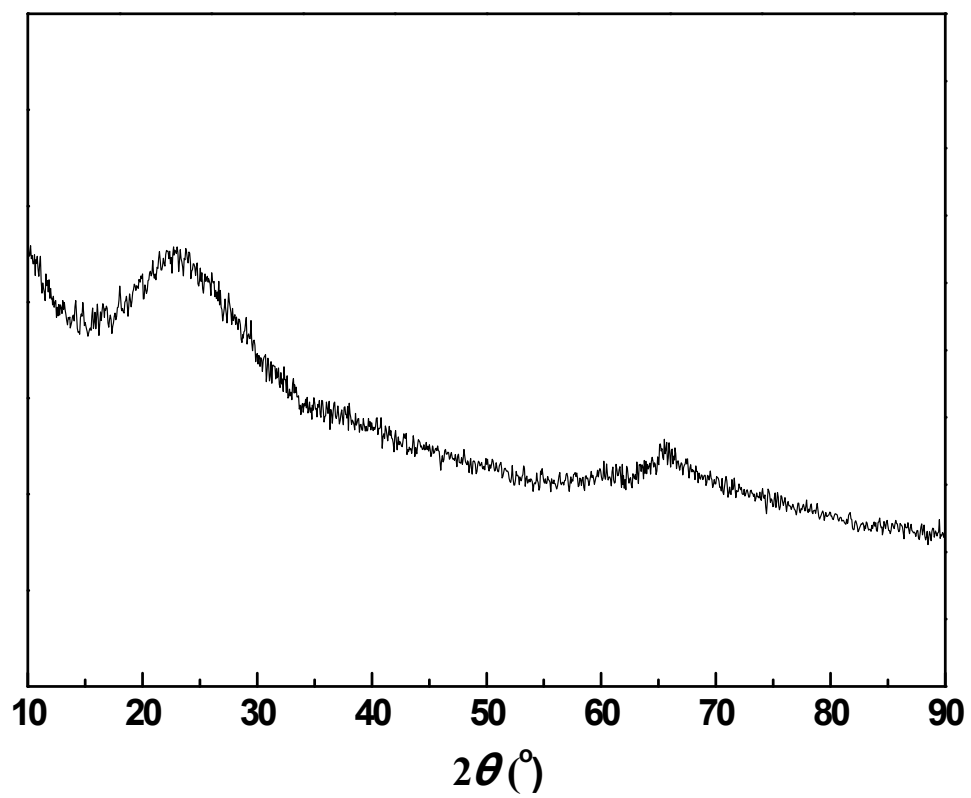

**Figure S1.** XRD pattern of  $\text{SiO}_2/\text{Al}_2\text{O}_3$  catalyst

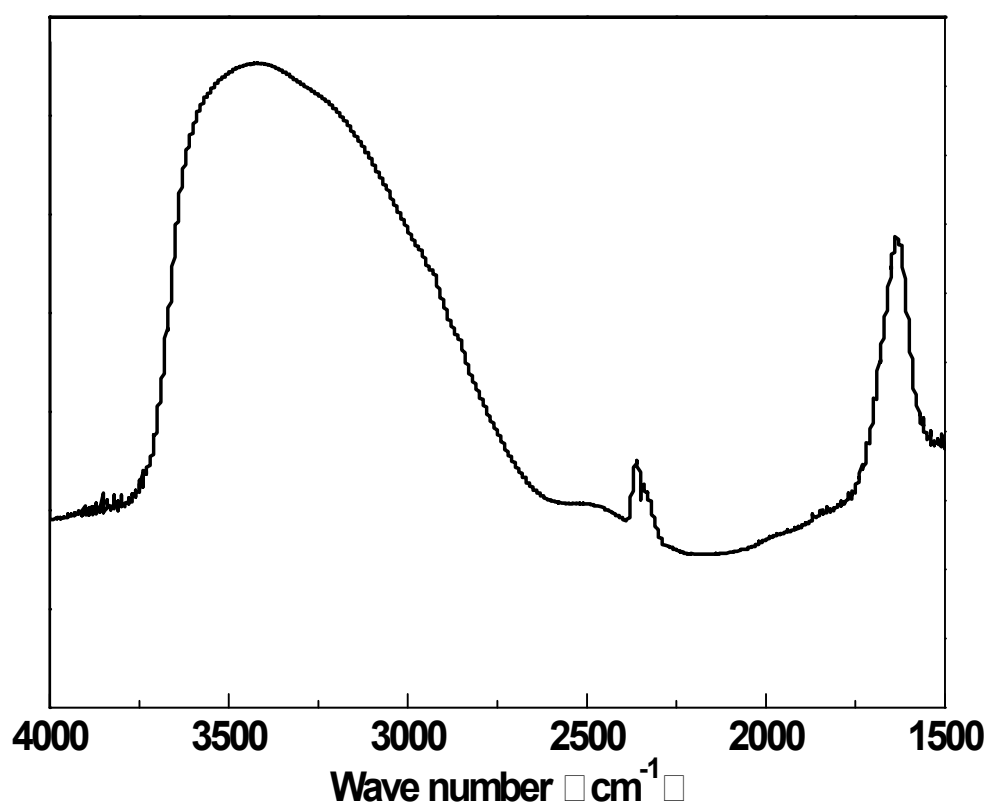

**Figure S2.** FT-IR spectrum of  $\text{SiO}_2/\text{Al}_2\text{O}_3$  catalyst

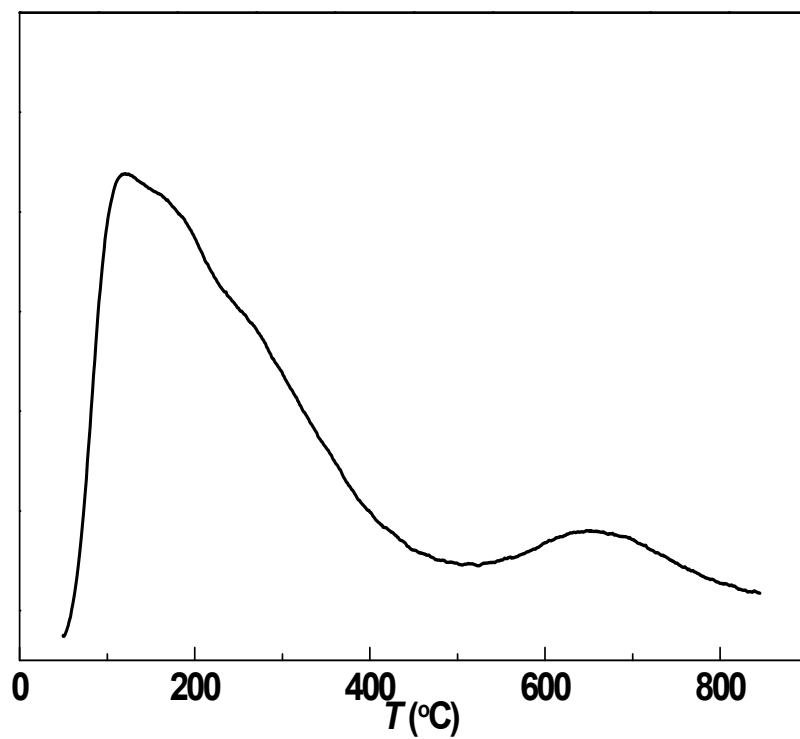

**Figure S3.**  $\text{NH}_3$ -TPD profiles of  $\text{SiO}_2/\text{Al}_2\text{O}_3$  catalyst

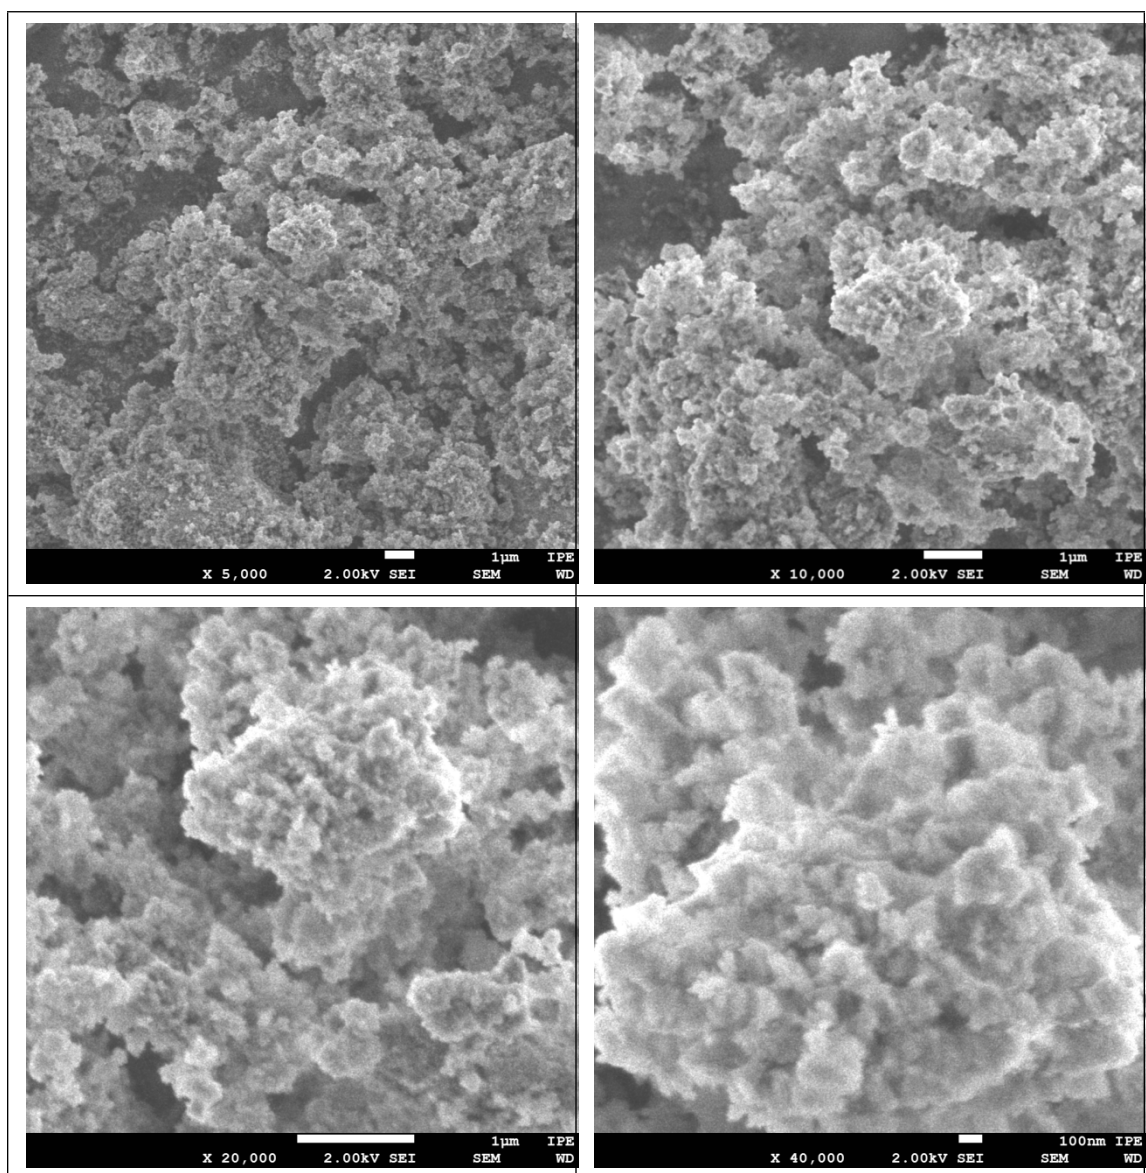

**Figure S4.** SEM image of  $\text{SiO}_2/\text{Al}_2\text{O}_3$  catalyst

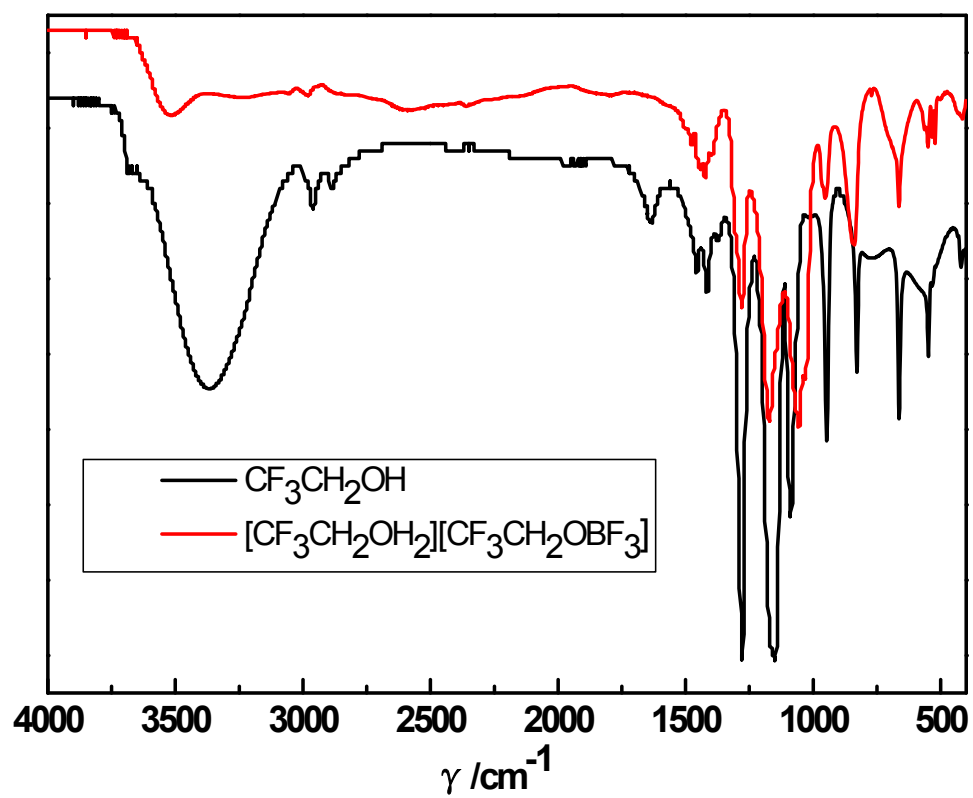

**Figure S5.** FT-IR spectrum of  $\text{CF}_3\text{CH}_2\text{OH}$  and  $[\text{CF}_3\text{CH}_2\text{OH}_2][\text{CF}_3\text{CH}_2\text{OBF}_3]$



**Table S1.** Low temperature physical adsorption–desorption of nitrogen by SiO<sub>2</sub>/Al<sub>2</sub>O<sub>3</sub> catalyst

| BET Surface Area (m <sup>2</sup> /g) | Pore Volume (cm <sup>3</sup> /g) | Pore Size (nm) | Nanoparticle Size (nm) |
|--------------------------------------|----------------------------------|----------------|------------------------|
| 476.9                                | 0.57                             | 4.8            | 12.6                   |

**Table S2.** Hydrogenation of 1-butene and 2-butene over Pd/C

| Entry | Reactant | H <sub>2</sub> pressure<br>(MPa) | Time (h) | Temp.( °C) | Yield of n-butane (%) |
|-------|----------|----------------------------------|----------|------------|-----------------------|
| 1     | 1-butene | 5                                | 2        | 180        | >99                   |
| 2     | 2-butene | 5                                | 2        | 180        | >99                   |
| 3     | 1-butene | 2                                | 2        | 120        | 97                    |
| 4     | 2-butene | 2                                | 2        | 120        | 98                    |

Conditions: 100 ml batch type reactor, 5 ml compressed (liquefied at room temperature) butene reactant, 0.1 g catalyst, with continuous stirring at 600 rpm; the products were analyzed by GC-FID.

**Table S3.** Isomerization of *n*-butane over Pd/ZSM-8

| Entry | Reactant         | H <sub>2</sub> pressure (MPa) | Temp.( °C) | Isobutane (%) |
|-------|------------------|-------------------------------|------------|---------------|
| 1     | <i>n</i> -butane | 0.3                           | 350        | 55            |
| 2     | <i>n</i> -butane | 0.3                           | 380        | 62            |

Conditions: fixed-bed reactor, 1 g catalyst, WHSV, 1 h<sup>-1</sup>; the products were analyzed by GC-FID.

**Table S4.** Reusability of [CF<sub>3</sub>CH<sub>2</sub>OH<sub>2</sub>][CF<sub>3</sub>CH<sub>2</sub>O-BF<sub>3</sub>]

| Exp. cycles | 1    | 2    | 3    | 4    | 5    | 6    | 7    | 8    | 9    | 10   | 11   | 12   |
|-------------|------|------|------|------|------|------|------|------|------|------|------|------|
| Time (min)  | 10   | 10   | 10   | 10   | 10   | 10   | 10   | 10   | 10   | 10   | 10   | 10   |
| Temp.(°C)   | 10   | 10   | 10   | 10   | 10   | 10   | 10   | 10   | 10   | 10   | 10   | 10   |
| C5 (%)      | 1    | 2    | 1    | 2    | 2    | 1    | 2    | 2    | 1    | 1    | 1    | 1    |
| C6 (%)      | 2    | 2    | 2    | 3    | 3    | 3    | 3    | 3    | 3    | 2    | 2    | 2    |
| C7 (%)      | 2    | 3    | 3    | 4    | 4    | 4    | 4    | 4    | 3    | 3    | 3    | 2    |
| C8 (%)      | 82   | 78   | 73   | 69   | 63   | 58   | 50   | 49   | 46   | 44   | 41   | 38   |
| TMP (%)     | 73   | 69   | 64   | 59   | 54   | 48   | 41   | 40   | 39   | 37   | 35   | 32   |
| DMH (%)     | 9    | 9    | 9    | 10   | 9    | 10   | 9    | 9    | 7    | 6    | 5    | 5    |
| TMP/DMH     | 8    | 8    | 7    | 6    | 6    | 5    | 5    | 5    | 6    | 6    | 7    | 6    |
| C9+ (%)     | 13   | 14   | 20   | 23   | 28   | 34   | 42   | 42   | 47   | 50   | 54   | 58   |
| RON         | 95.4 | 94.9 | 93.5 | 92.6 | 91.6 | 90.1 | 88.9 | 88.9 | 88.8 | 88.5 | 88.0 | 87.3 |

**Table S5.** Detected compounds produced by alkylation of butenes (1-butene and 2-butene) and isobutane by GC-Fid

| No. | Retention time | Carbon number | Compound                |
|-----|----------------|---------------|-------------------------|
| 1   | 10.536         | C4            | isobutane               |
| 2   | 11.979         | C5            | 2-methylbutane          |
| 3   | 14.496         | C6            | 2,3-dimethylbutane      |
| 4   | 14.591         | C6            | 2-methylpentane         |
| 5   | 15.155         | C6            | 3-methylpentane         |
| 6   | 17.289         | C7            | 2,4-dimethylpentane     |
| 7   | 17.684         | C7            | 2,2,3-trimethylbutane   |
| 8   | 19.114         | C7            | 2-methylhexane          |
| 9   | 19.526         | C7            | 2,3-dimethylpentane     |
| 10  | 19.86          | C7            | 3-methylhexane          |
| 11  | 21.035         | C8            | 2,2,4-trimethylpentane  |
| 12  | 23.666         | C8            | 2,5-dimethylhexane      |
| 13  | 23.872         | C8            | 2,4-dimethylhexane      |
| 14  | 23.999         | C8            | 2,2,3-trimethylpentane  |
| 15  | 25.29          | C8            | 2,3,4-trimethylpentane  |
| 16  | 25.787         | C8            | 2,3,3-trimethylpentane  |
| 17  | 25.903         | C8            | 2,3-dimethylhexane      |
| 18  | 26.015         | C8            | 3-ethyl-2-methylpentane |
| 19  | 26.122         | C8            | 2-methylheptane         |
| 20  | 26.25          | C8            | 4-methylheptane         |
| 21  | 26.527         | C8            | 3,4-dimethylhexane      |
| 22  | 26.699         | C8            | 3-methylheptane         |
| 23  | 27.778         | C9            | 2,2,5-trimethylhexane   |
| 24  | 27.778+        | C9+           |                         |
